# Supplementary material for: Synthesis and Biochemical Evaluation of 8H-Indeno[1,2-d]thiazole Derivatives as Novel SARS-CoV-2 3CL Protease Inhibitors
Source: MDPI journal article supplement (doi:10.3390/molecules27103359), 2022-05-23
Supplement: s1 [file s1]

## Supplementary Materials

### Synthesis and Biochemical Evaluation of 8*H*-Indeno[1,2-*d*]thiazole Derivatives as Novel SARS-CoV-2 3CL Protease Inhibitors

Jing Wu <sup>1,†</sup>, Bo Feng <sup>2,3,†</sup>, Li-Xin Gao <sup>1,3</sup>, Chun Zhang <sup>1</sup>, Jia Li <sup>2,3,4</sup>, Da-Jun Xiang <sup>5,\*</sup>, Yi Zang <sup>3,\*</sup> and Wen-Long Wang <sup>1,\*</sup>

<sup>1</sup> School of Life Sciences and Health Engineering, Jiangnan University, Wuxi 214122, China;

<sup>2</sup> School of Life Science and Biopharmaceutics, Shenyang Pharmaceutical University, Shenyang 110016, China

<sup>3</sup> State key Laboratory of Drug Research, Shanghai Institute of Materia Medica, Chinese Academy of Sciences, Shanghai, 201203, China;

<sup>4</sup> Zhongshan Institute for Drug Discovery, Shanghai Institute of Materia Medica, Chinese Academy of Sciences, Zhongshan Tsuihang New District, Guangdong 528400, China;

<sup>5</sup> Xishan People's Hospital of Wuxi City, Wuxi 214105, China.

\* Correspondence: Xishan People's Hospital of Wuxi City, Wuxi, 214105, China (D.-J. Xiang). State key Laboratory of Drug Research, Shanghai Institute of Materia Medica, Chinese Academy of Sciences, Shanghai 201203, China (Y. Zang). School of Pharmaceutical Sciences, Jiangnan University, Wuxi 214122, China (W. Wang). E-mail addresses: xiangdjxshospital@yeah.net (D. Xiang), yzang@simm.ac.cn (Y. Zang), wenlong-wang@jiangnan.edu.cn (W.-L. Wang).

<sup>†</sup> These authors contributed equally to this work.

## Tables of Contents

|                                             |    |
|---------------------------------------------|----|
| Spectral data for compound <b>4</b> .....   | 3  |
| Spectral data for compound <b>7a</b> .....  | 4  |
| Spectral data for compound <b>7b</b> .....  | 5  |
| Spectral data for compound <b>7c</b> .....  | 6  |
| Spectral data for compound <b>7d</b> .....  | 7  |
| Spectral data for compound <b>7e</b> .....  | 8  |
| Spectral data for compound <b>7f</b> .....  | 9  |
| Spectral data for compound <b>7g</b> .....  | 10 |
| Spectral data for compound <b>7h</b> .....  | 11 |
| Spectral data for compound <b>7i</b> .....  | 12 |
| Spectral data for compound <b>7j</b> .....  | 13 |
| Spectral data for compound <b>7k</b> .....  | 14 |
| Spectral data for compound <b>7l</b> .....  | 15 |
| Spectral data for compound <b>10a</b> ..... | 16 |
| Spectral data for compound <b>10b</b> ..... | 17 |
| <b>Figure S1</b> .....                      | 18 |
| <b>Figure S2</b> .....                      | 18 |

# <sup>1</sup>H NMR of compound 4

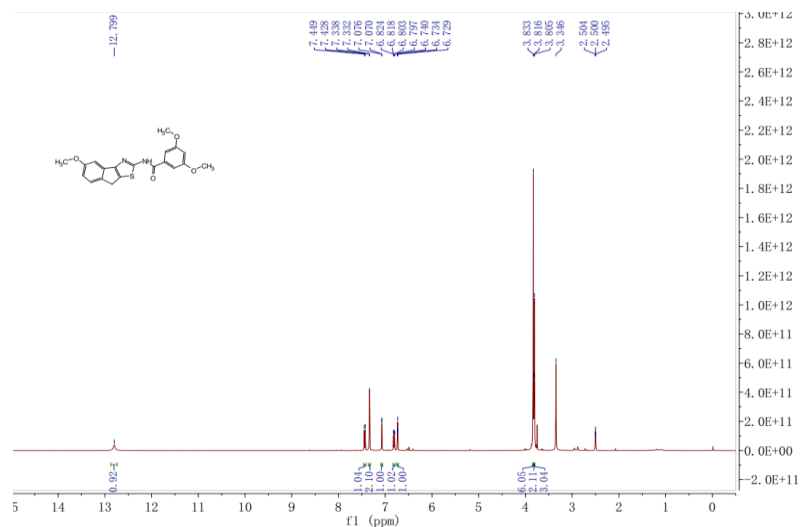

# <sup>13</sup>C NMR of compound 4

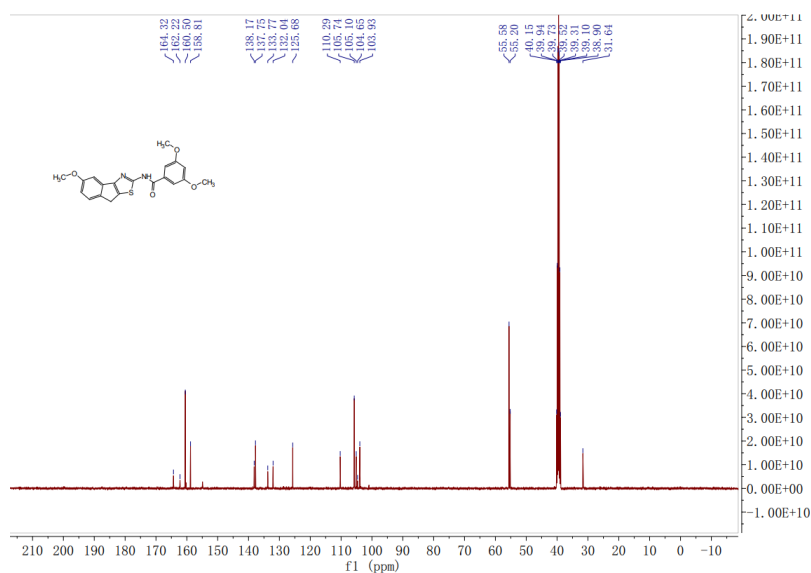

# MS of compound 4

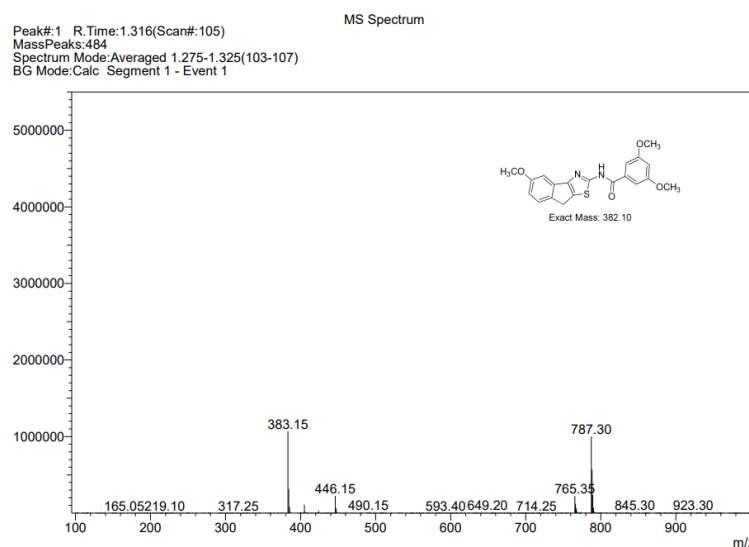

# <sup>1</sup>H NMR of compound **7a**

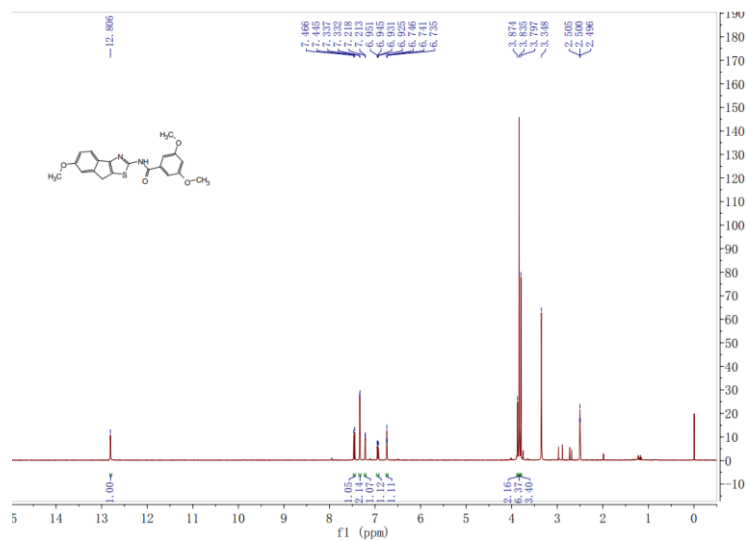

# <sup>13</sup>C NMR of compound **7a**

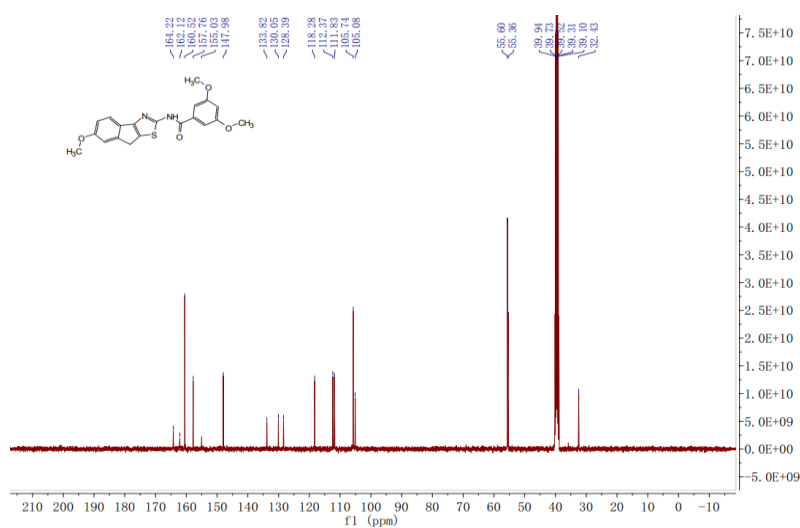

# MS of compound **7a**

Peak# 1 R.Time:1.450(Scan#:115)  
MassPeaks:479  
Spectrum Mode:Averaged 1.400-1.450(113-117)  
BG Mode:Calc Segment 1 - Event 1

## MS Spectrum

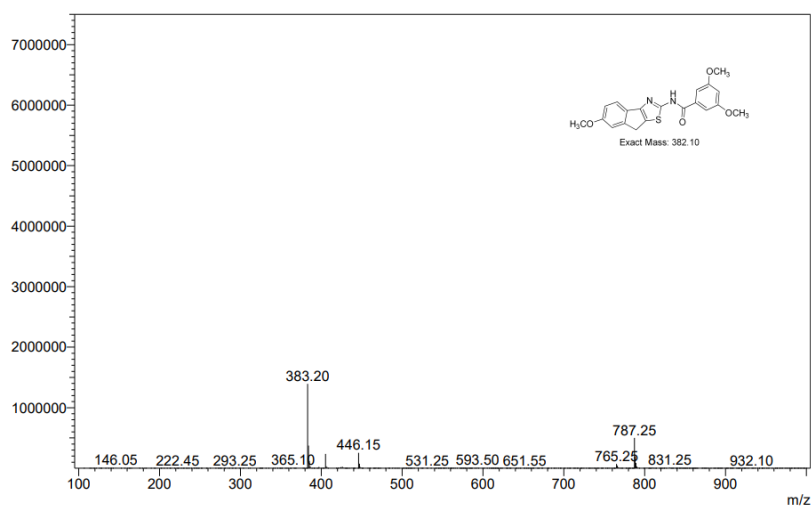

<sup>1</sup>H NMR of compound **7b**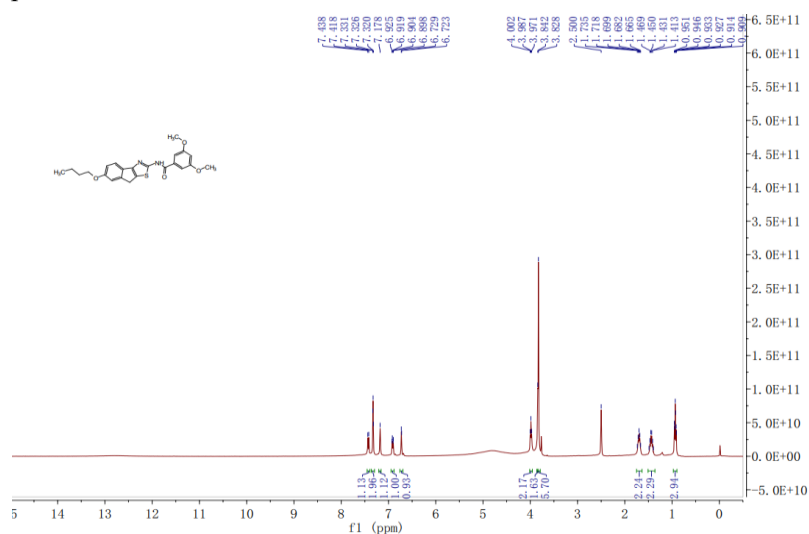 $^{13}\text{C}$  NMR of compound **7b**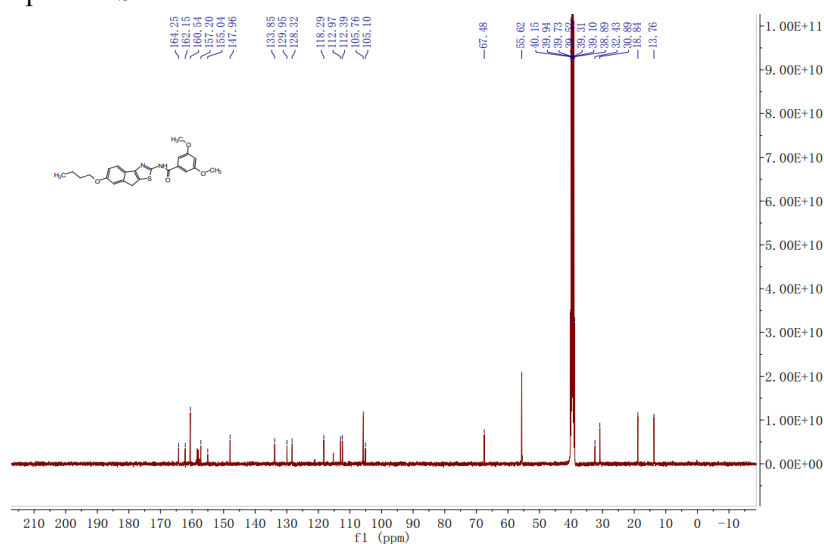MS of compound **7b**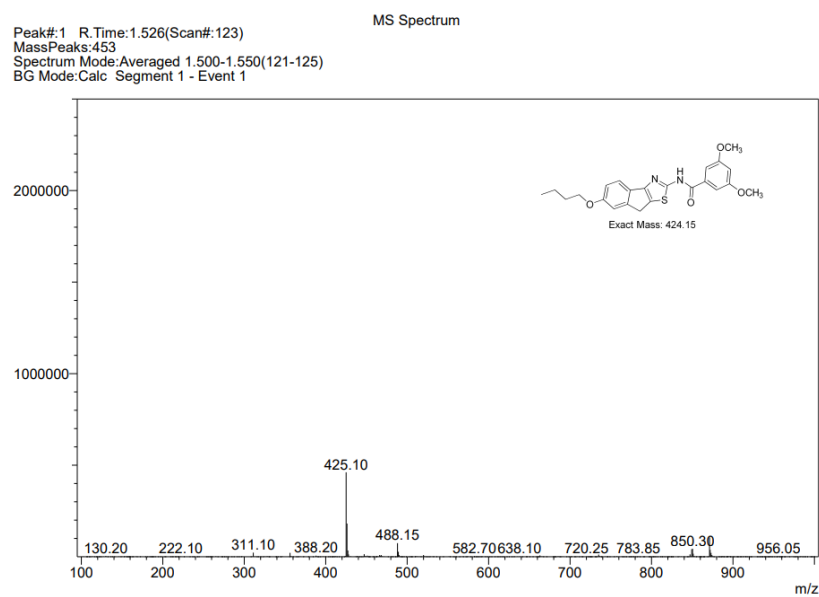

# <sup>1</sup>H NMR of compound **7c**

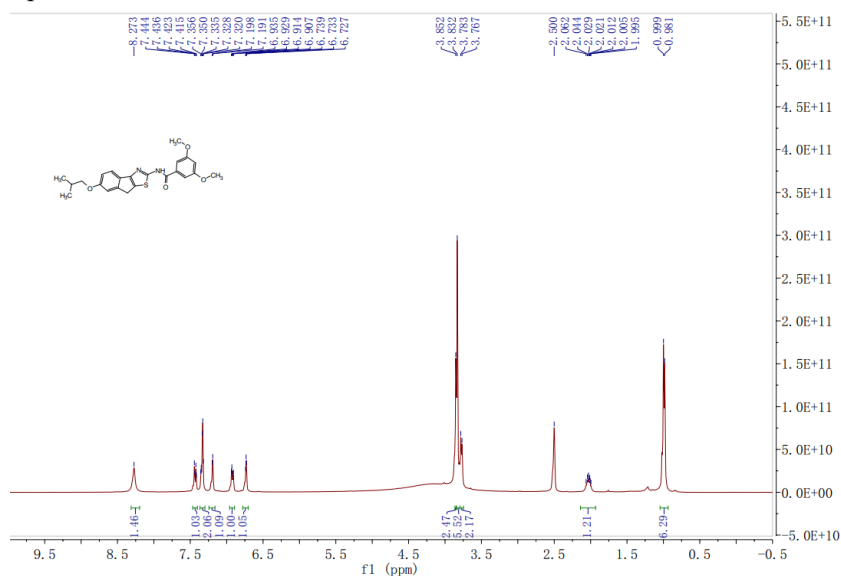

# <sup>13</sup>C NMR of compound **7c**

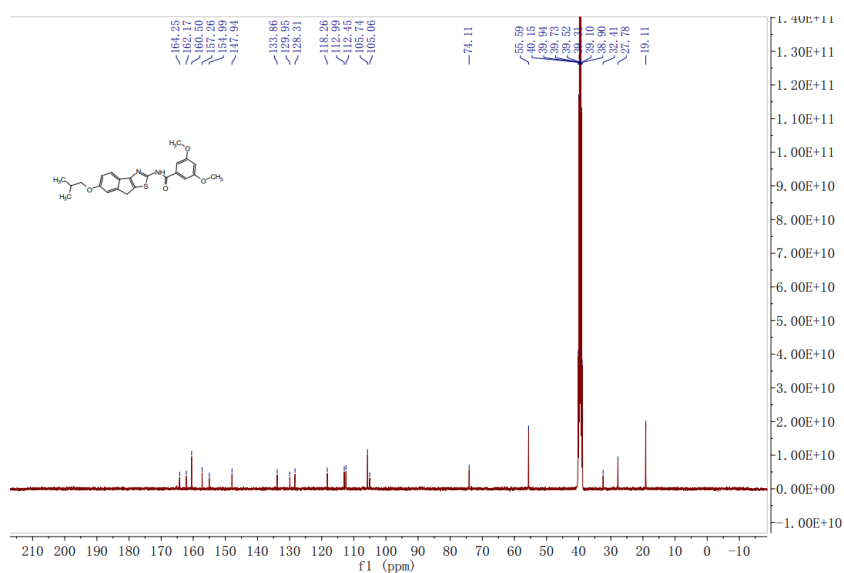

# MS of compound **7c**

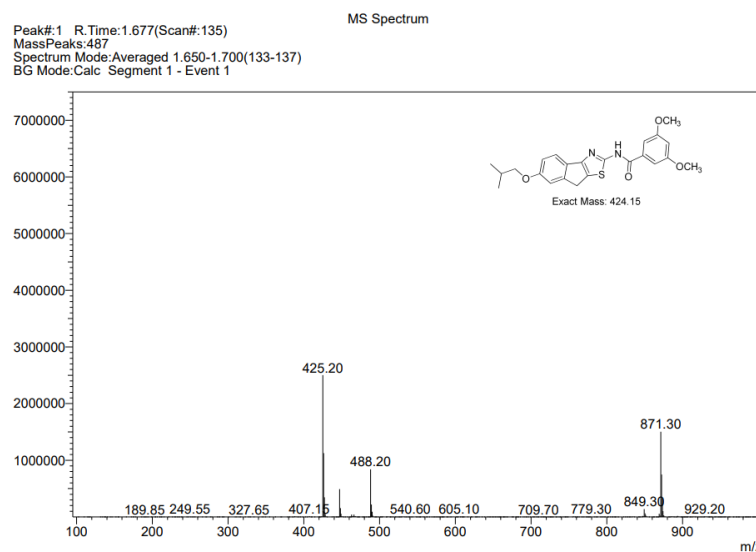

# <sup>1</sup>H NMR of compound **7d**

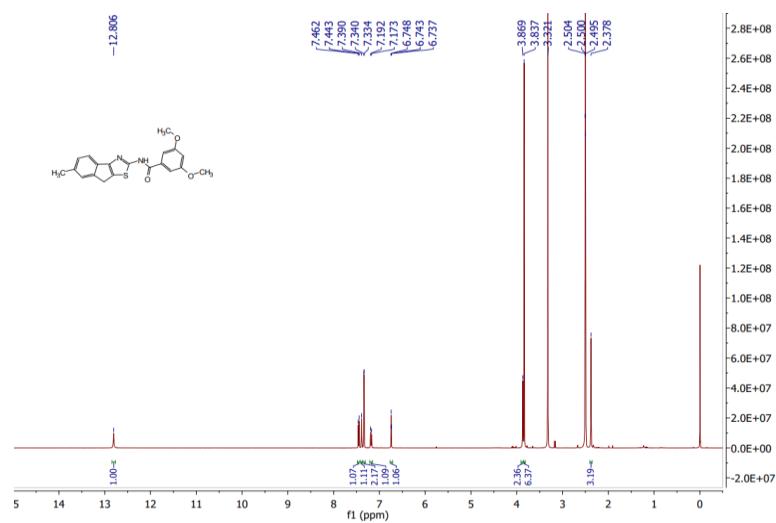

# <sup>13</sup>C NMR of compound **7d**

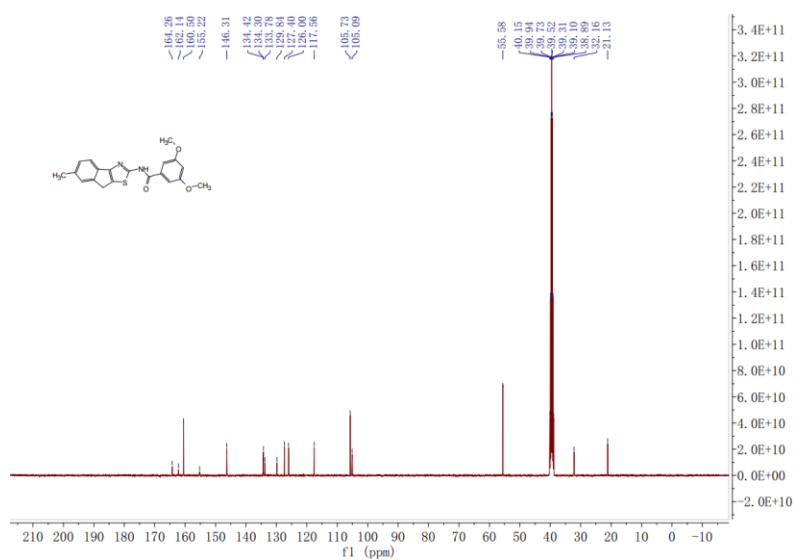

# MS of compound **7d**

Peak# 1 R.Time:1.561(Scan#:125)  
 MassPeaks:439  
 Spectrum Mode:Averaged 1.525-1.575(123-127)  
 BG Mode:Calc Segment 1 - Event 1

MS Spectrum

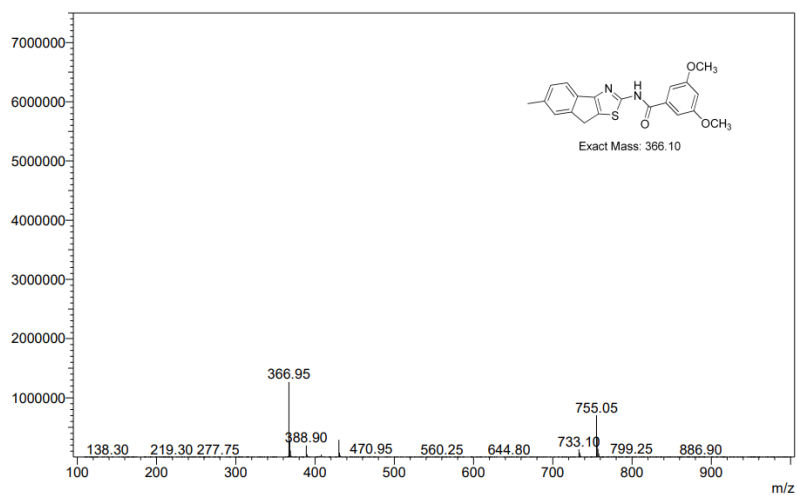

# <sup>1</sup>H NMR of compound 7e

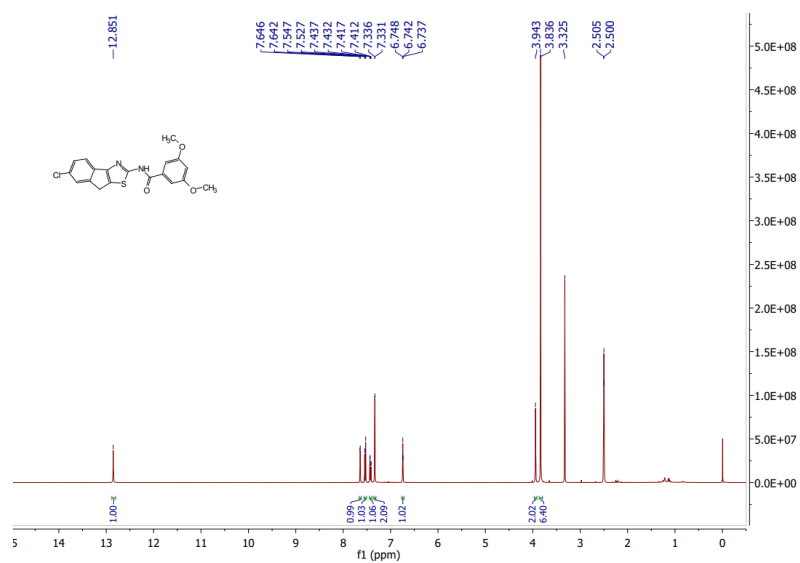

# <sup>13</sup>CNMR of compound 7e

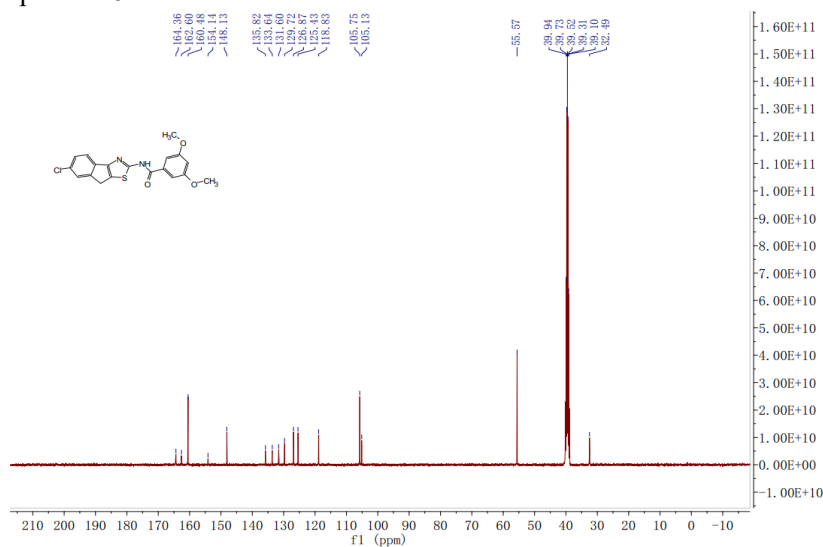

# MS of compound 7e

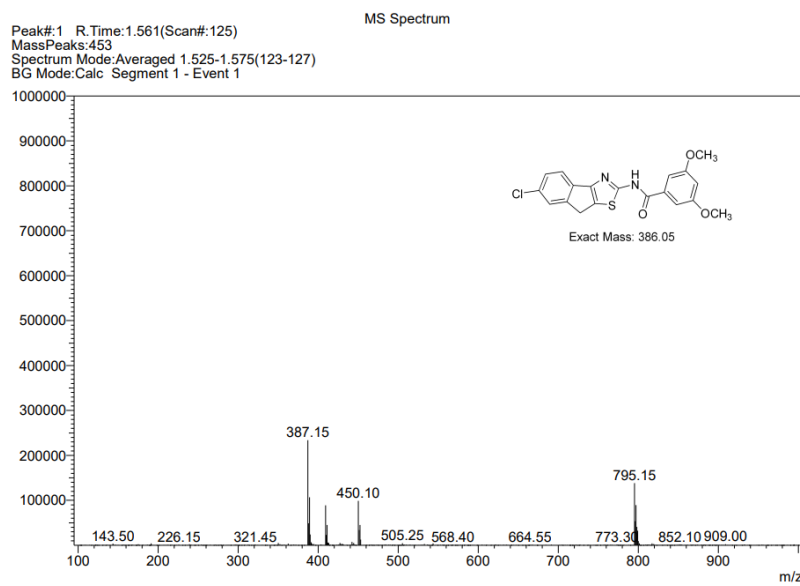



<sup>1</sup>H NMR of compound **7f**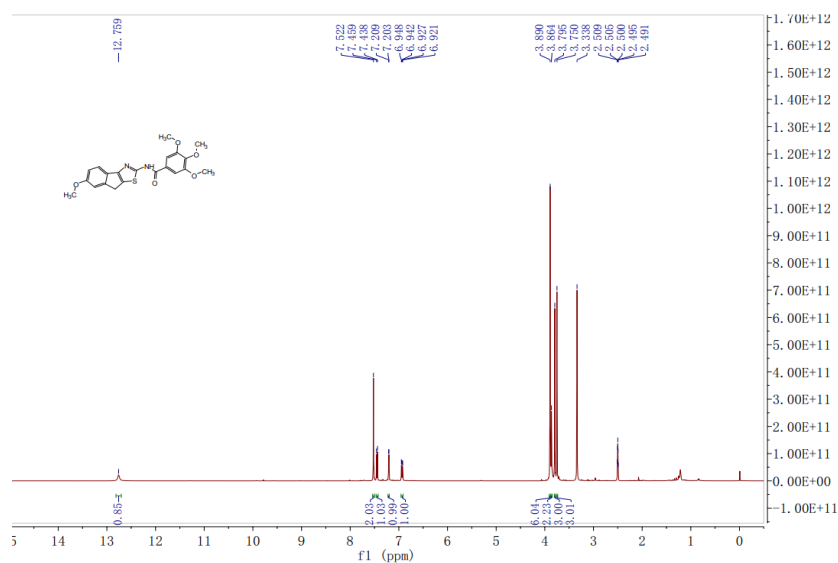 $^{13}\text{C}$  NMR of compound **7f**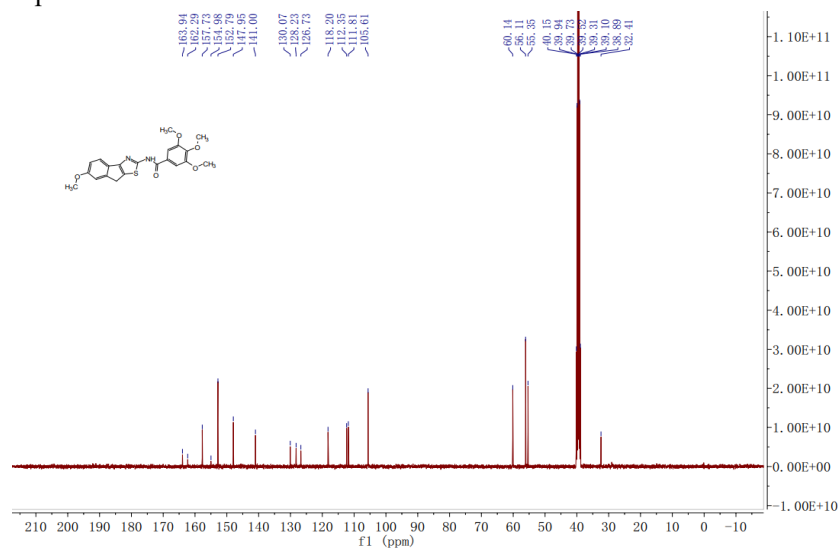MS of compound **7f**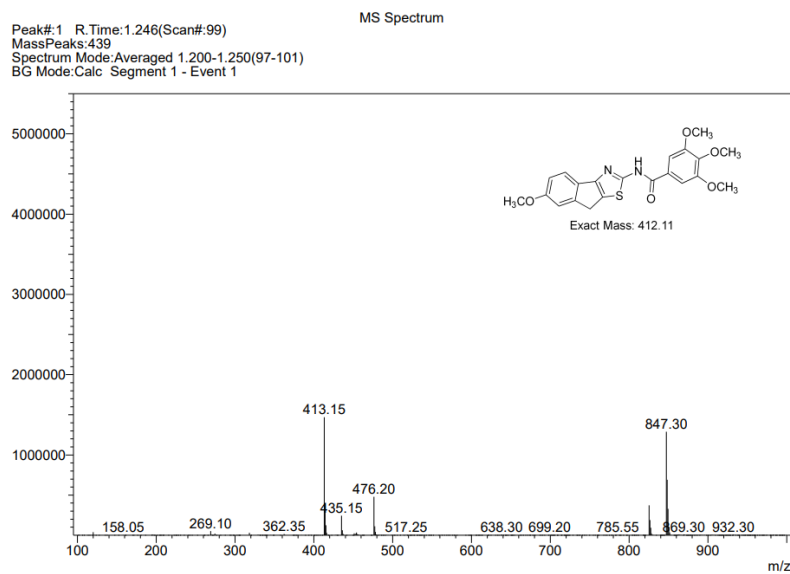

# <sup>1</sup>H NMR of compound **7g**

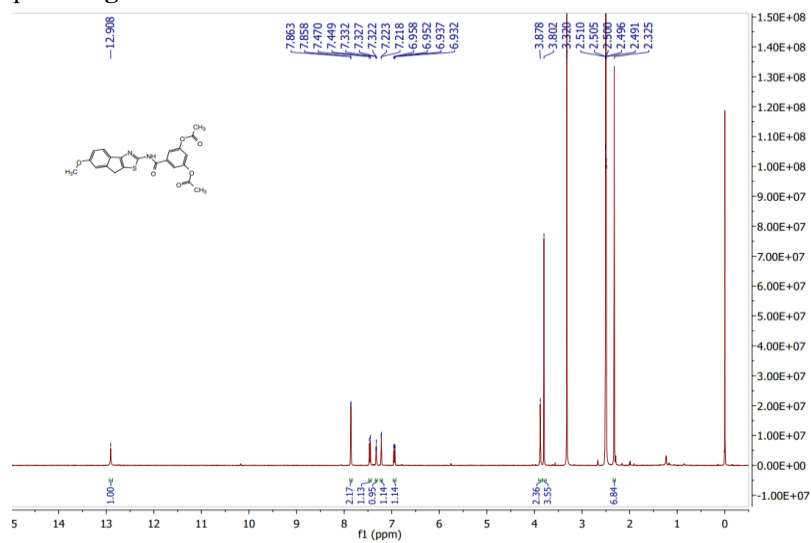

# <sup>13</sup>C NMR of compound **7g**

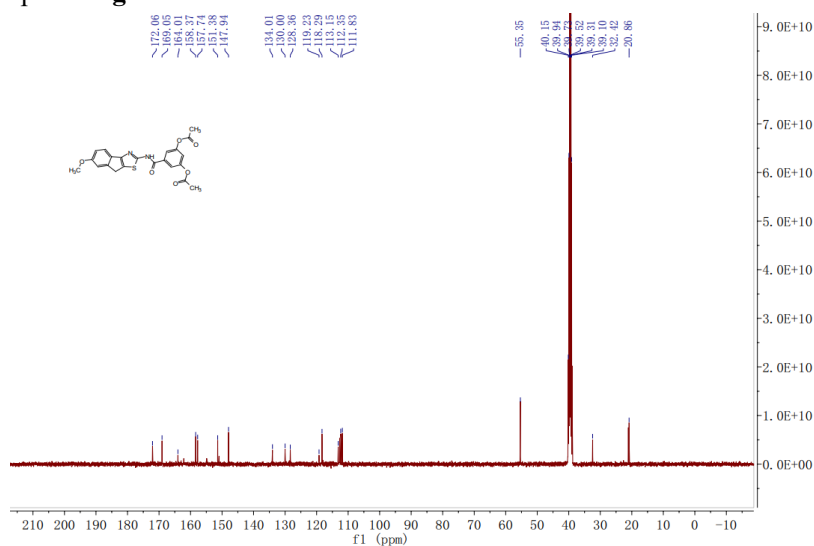

# MS of compound **7g**

Peak#:1 R.Time:1.350(Scan#:107)  
MassPeaks:442  
Spectrum Mode:Averaged 1.300-1.350(105-109)  
BG Mode:Calc Segment 1 - Event 1

## MS Spectrum

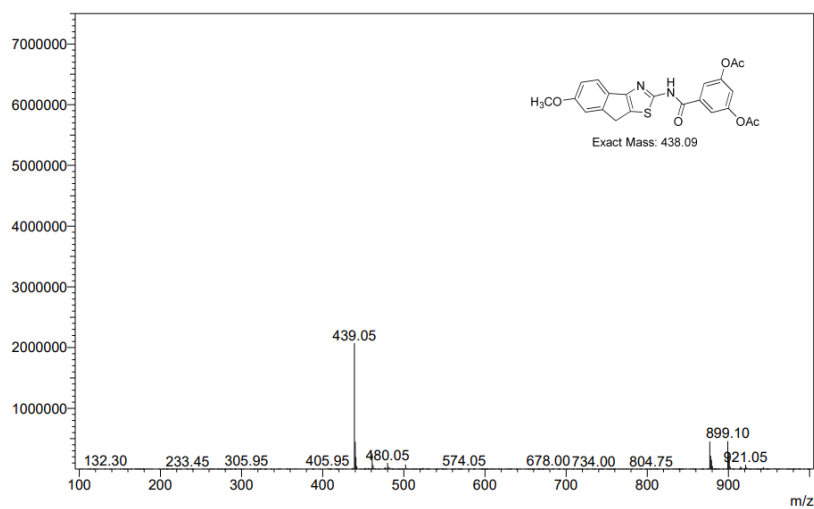

# <sup>1</sup>H NMR of compound **7h**

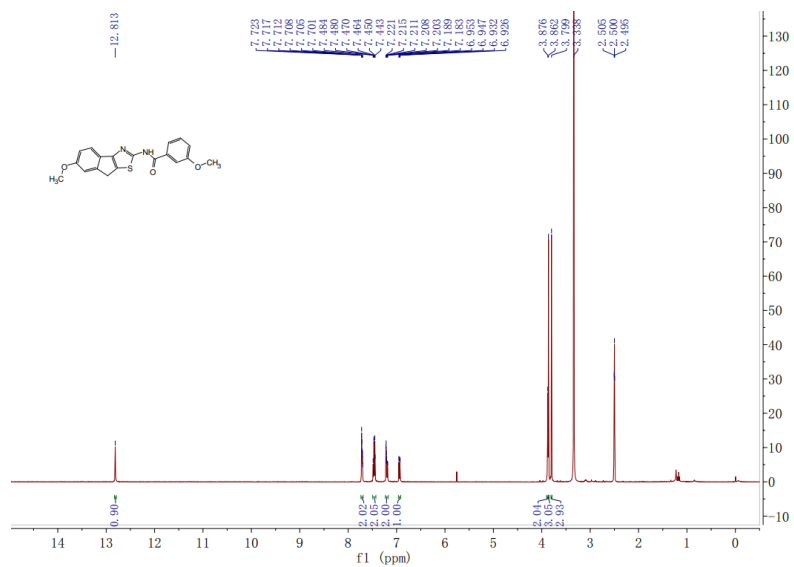

# <sup>13</sup>C NMR of compound **7h**

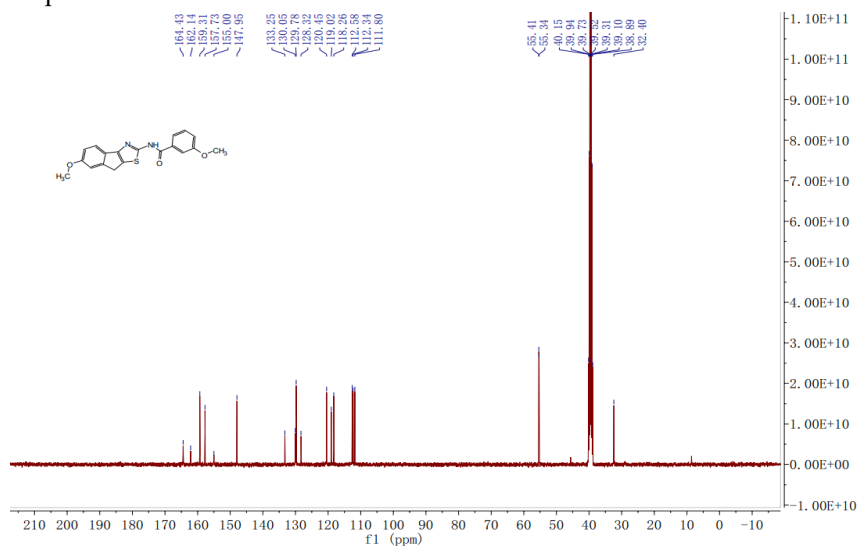

# MS of compound **7h**

Peak#1 R.Time:1.267(Scan#:101)  
MassPeaks:525  
Spectrum Mode:Averaged 1.225-1.275(99-103)  
BG Mode:Calc Segment 1 - Event 1

## MS Spectrum

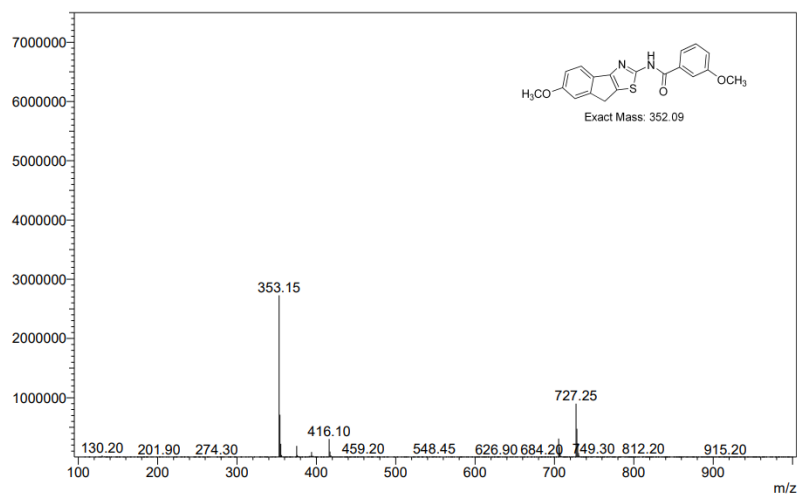

# <sup>1</sup>H NMR of compound **7i**

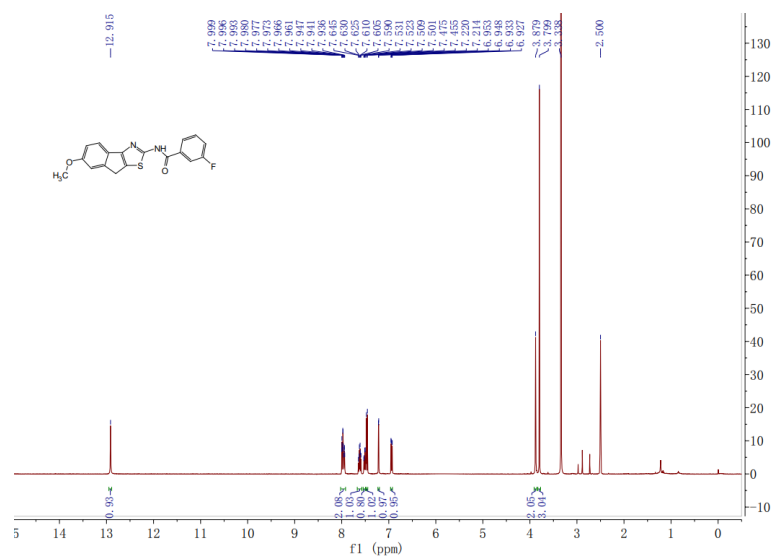

# <sup>13</sup>C NMR of compound **7i**

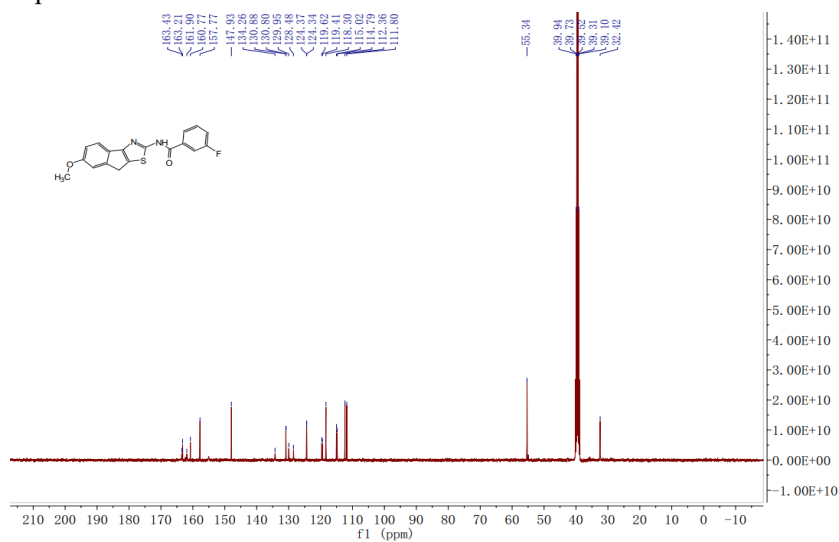

# MS of compound **7i**

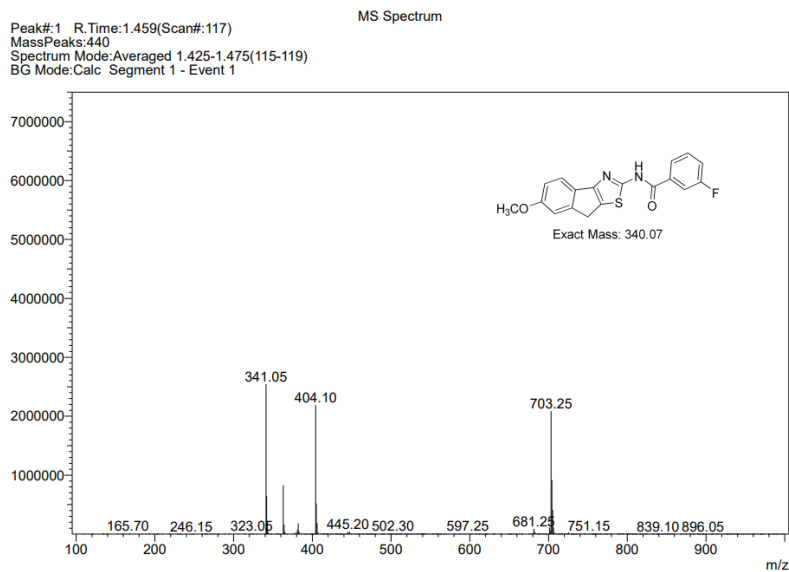

# <sup>1</sup>H NMR of compound **7j**

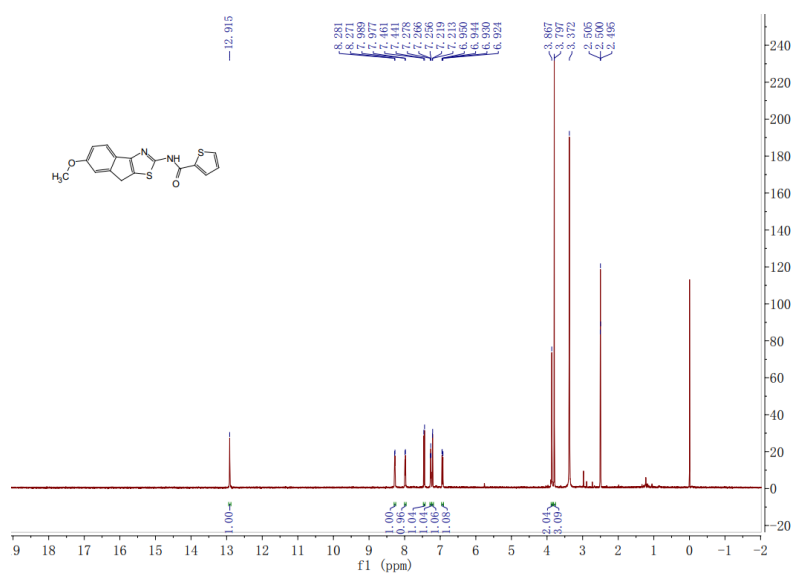

# <sup>13</sup>C NMR of compound **7j**

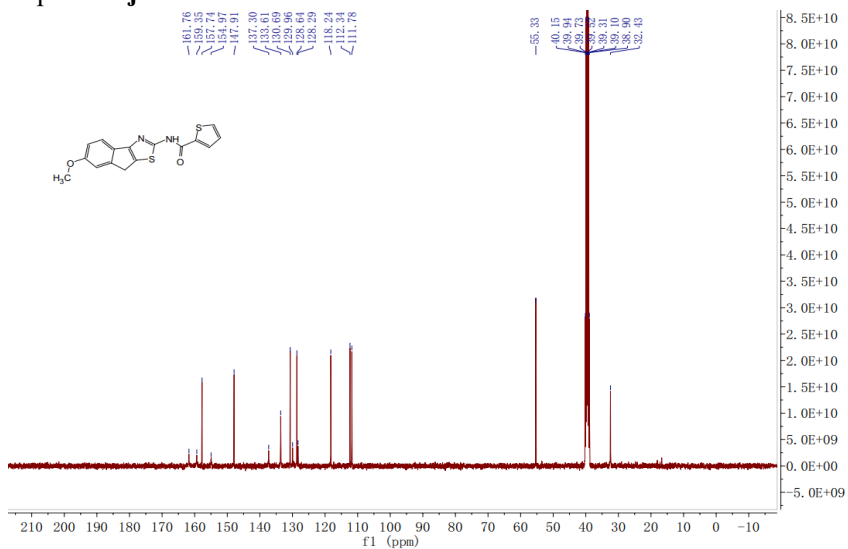

# MS of compound **7j**

Peak#:1 R.Time:1.192(Scan#:95)  
 MassPeaks:548  
 Spectrum Mode:Averaged 1.150-1.200(93-97)  
 BG Mode:Calc Segment 1 - Event 1

MS Spectrum

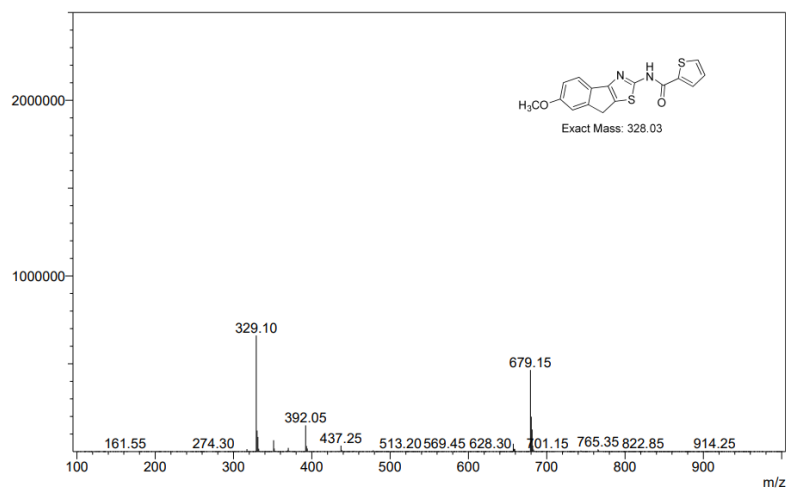

<sup>1</sup>H NMR of compound **7k**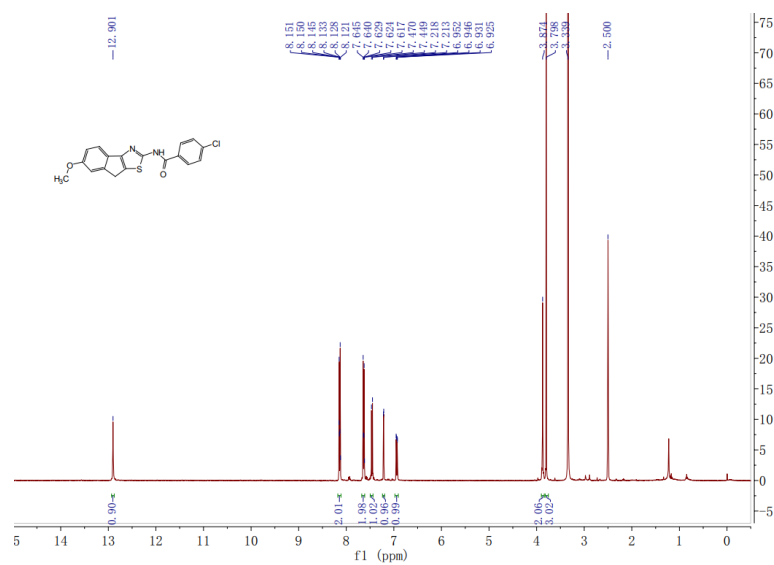 $^{13}\text{C}$  NMR of compound **7k**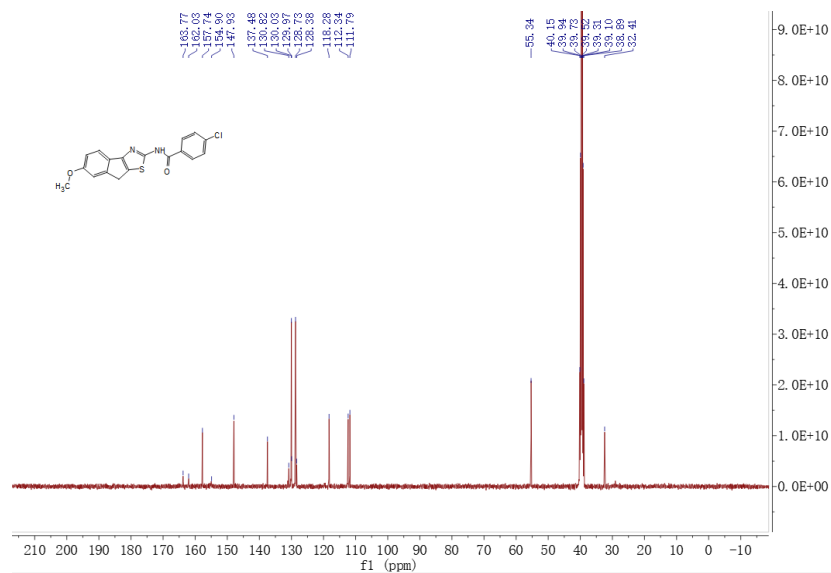MS of compound **7k**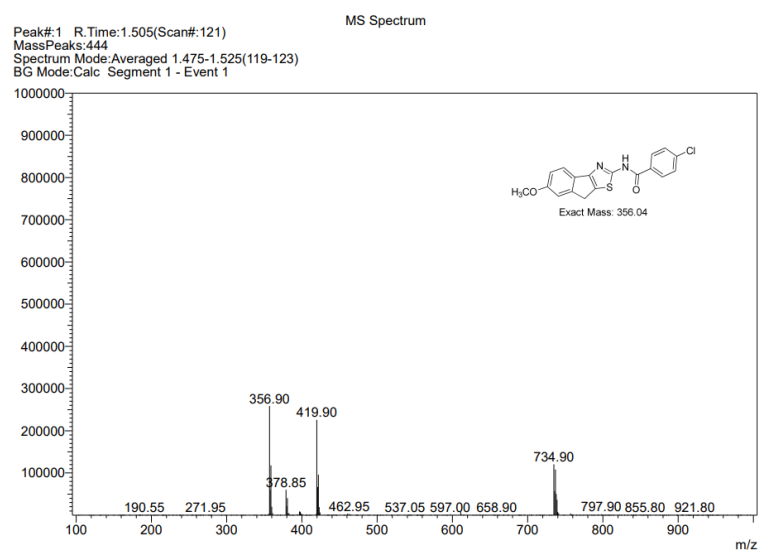

<sup>1</sup>H NMR of compound **71**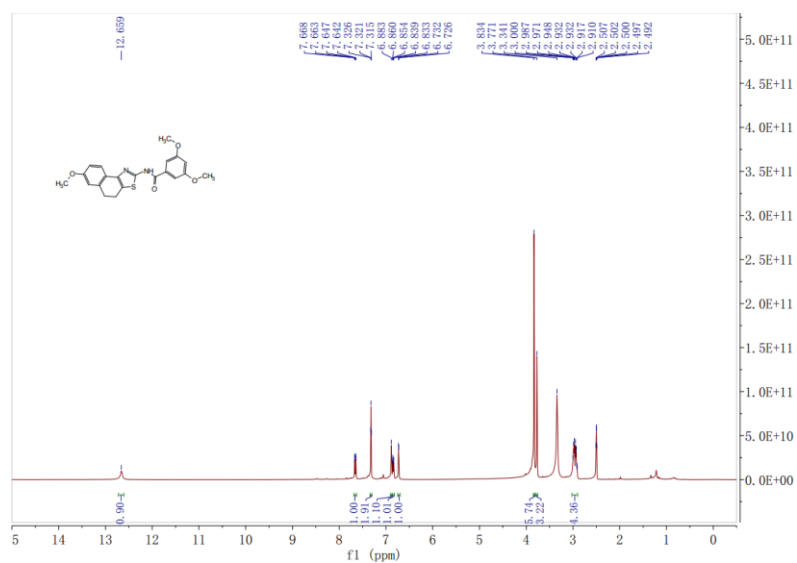 $^{13}\text{C}$  NMR of compound **71**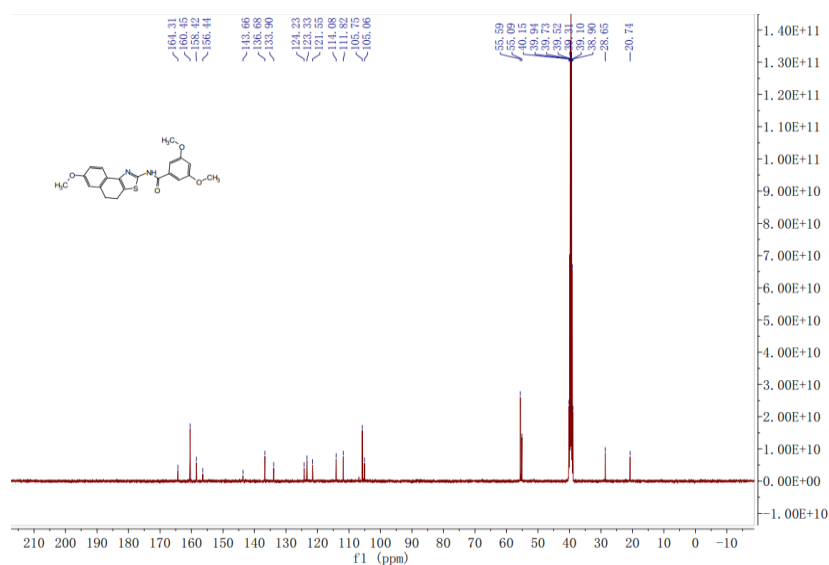

MS of compound **7l**

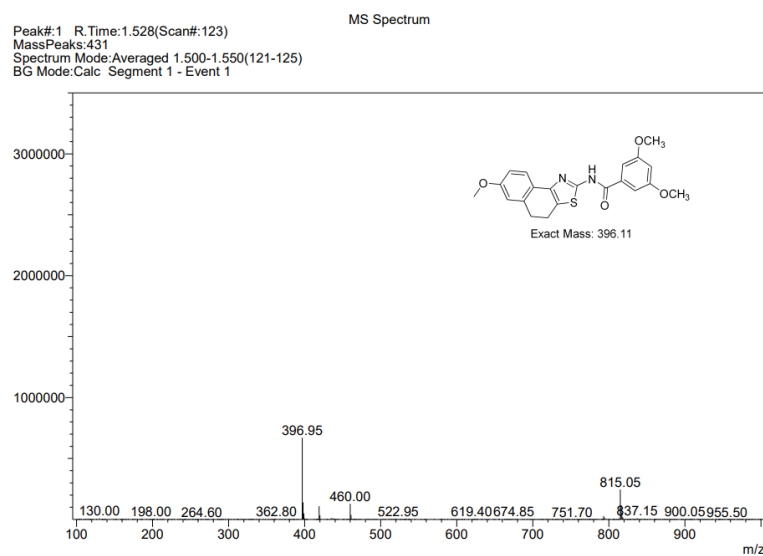

<sup>1</sup>H NMR of compound **10a**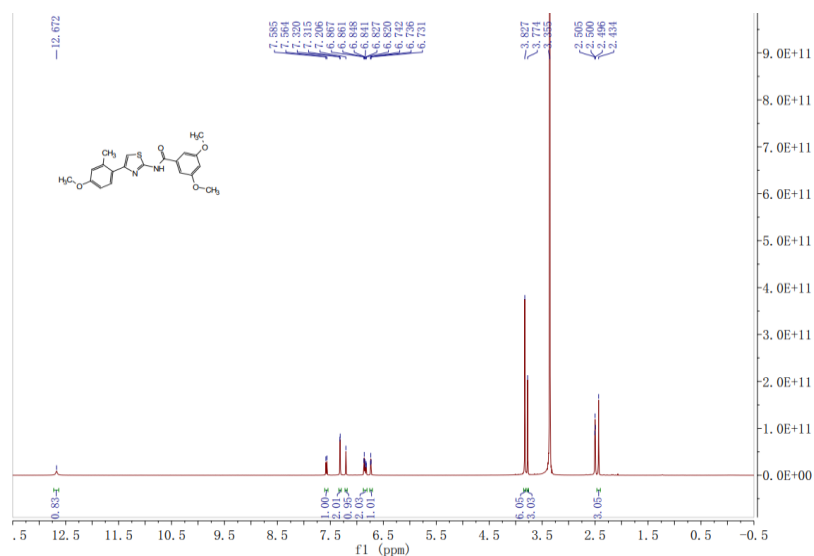 $^{13}\text{C}$  NMR of compound **10a**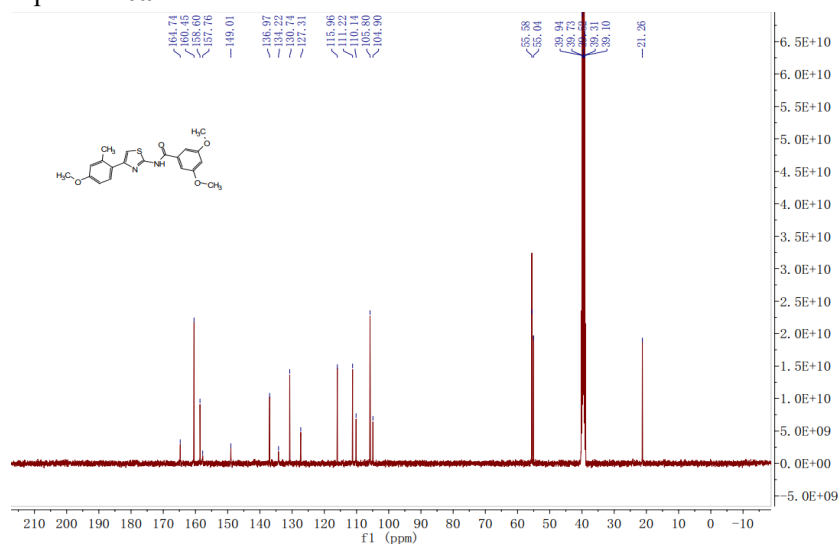

MS of compound **10a**

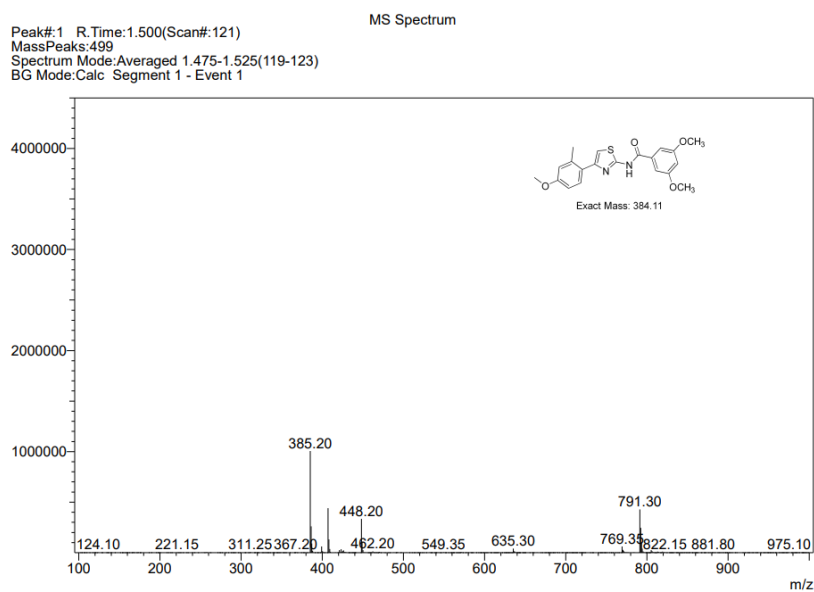



# <sup>1</sup>H NMR of compound **10b**

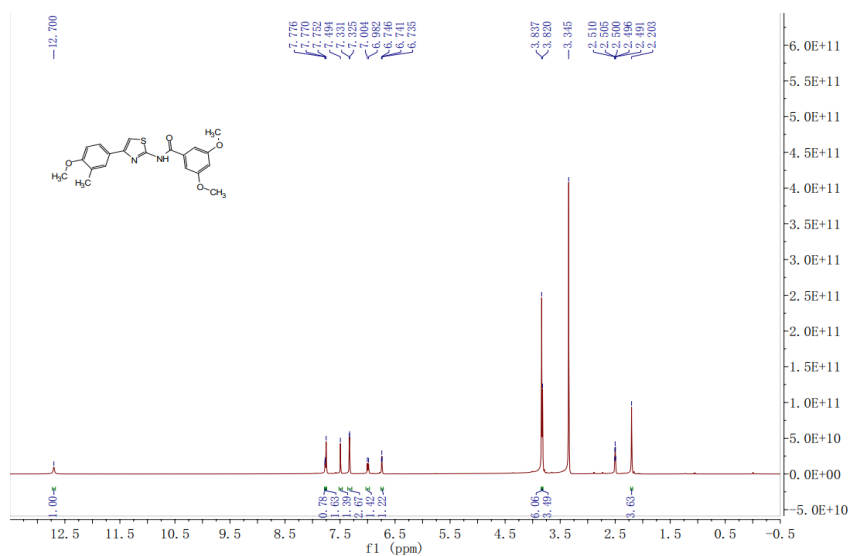

# <sup>13</sup>C NMR of compound **10b**

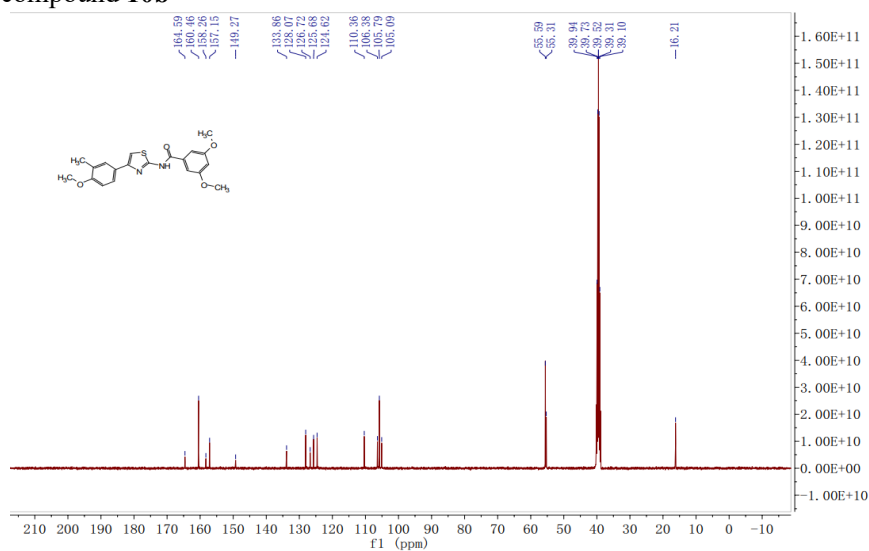

# MS of compound **10b**

Peak# 1 R.Time:1.531(Scan#:123)  
MassPeaks:481  
Spectrum Mode:Averaged 1.500-1.550(121-125)  
BG Mode:Calc Segment 1 - Event 1

MS Spectrum

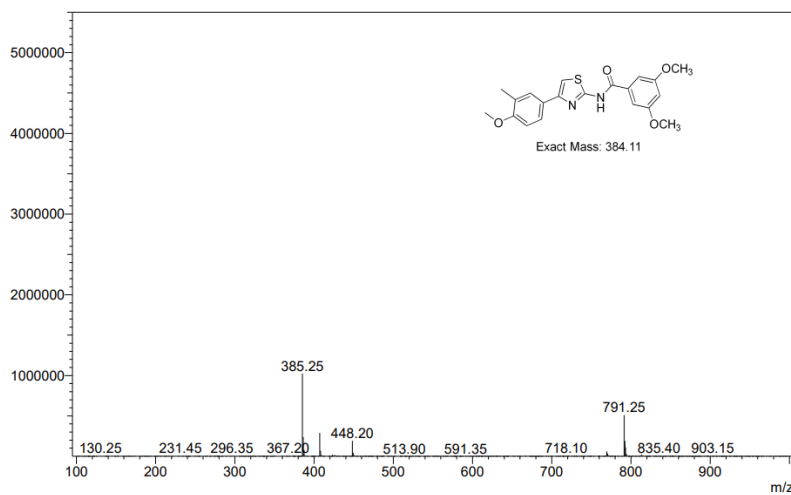

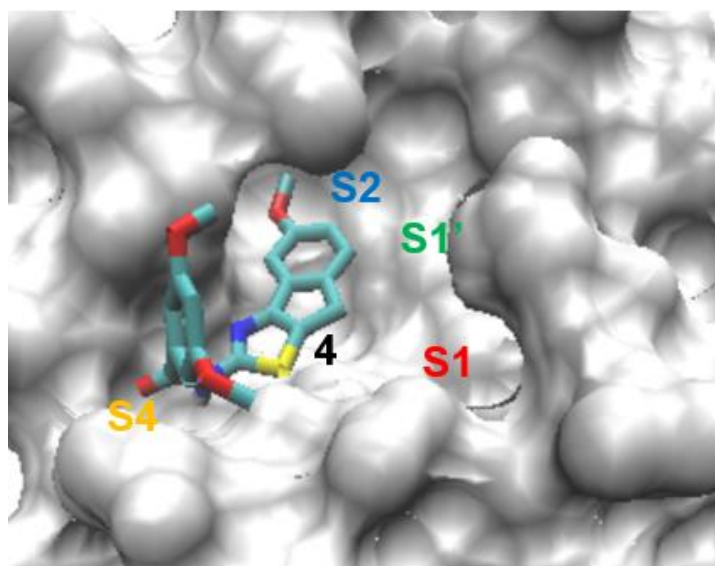

**Figure S1.** surf representation of the compound **4** (bonds representation) in the 3CL<sup>pro</sup> S1(red), S2(blue), S1'(green), S4(orange) binding pocket

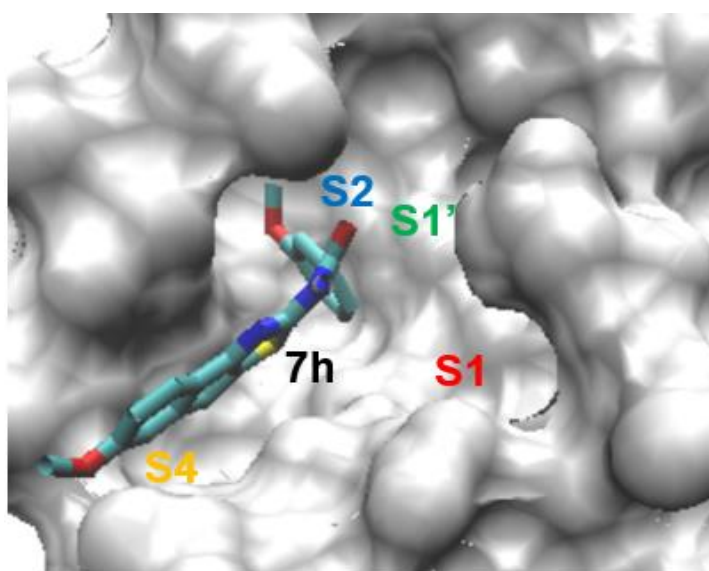

**Figure S2.** surf representation of the compound **7h** (bonds representation) in the 3CL<sup>pro</sup> S1(red), S2(blue), S1'(green), S4(orange) binding pocket
